# Supplementary material for: Pressure-induced Jahn–Teller switching in a Mn12 nanomagnet
Source: Royal Society of Chemistry journal article supplement (doi:10.1039/b923962f), 2010-01-01
Supplement: b923962f.pdf [file b923962f.pdf]

**ESI for 'Pressure-induced Jahn-Teller switching in a Mn<sub>12</sub> single-molecule magnet'**  
**Pascal Parois *et al.***

| Geometry around Mn8. <b>Bold</b> = significantly elongated. |                 |          |                  |                  |          |
|-------------------------------------------------------------|-----------------|----------|------------------|------------------|----------|
| Crystal                                                     | 0               | 2        | 1&2              | 1                | 2        |
| Data-set                                                    | SP8038          | MNJTRT   | MN0311           | MNJT04           | MNJT12   |
| Conditions                                                  | 150 K/0 GPa     | RT/0 GPa | RT/1.5 GPa       | RT/2.5 GPa       | RT/0GPa  |
| Distance/Å                                                  |                 |          |                  |                  |          |
| Mn8-O108                                                    | 1.893(3)        | 1.930(4) | 1.98(2)          | 1.88(3)          | 1.932(4) |
| Mn8-O13                                                     | 1.963(3)        | 2.002(5) | 2.02(3)          | 1.89(3)          | 1.994(4) |
| Mn8-O208                                                    | <b>2.049(2)</b> | 1.966(4) | 1.94(2)          | 1.90(3)          | 1.956(4) |
| Mn8-O25                                                     | <b>2.145(3)</b> | 2.025(4) | 2.04(3)          | 2.03(3)          | 2.022(5) |
| Mn8-O14                                                     | 1.961(2)        | 2.012(5) | <b>2.082(15)</b> | <b>2.105(17)</b> | 2.015(5) |
| Mn8-O26                                                     | 1.956(3)        | 2.010(5) | 2.034(17)        | <b>2.19(2)</b>   | 2.005(5) |

Table S1. Mn-O bond lengths at Mn8 as a function of pressure.

## Experimental details

In each case the crystal system is triclinic and the space group P-1. The value of  $Z = 2$ .

|                                                                                     |                                                                                                                                                                                           |                                          |                                                |                                                |                                                |
|-------------------------------------------------------------------------------------|-------------------------------------------------------------------------------------------------------------------------------------------------------------------------------------------|------------------------------------------|------------------------------------------------|------------------------------------------------|------------------------------------------------|
| Structure code in cif                                                               | sp8038                                                                                                                                                                                    | mnjtrt                                   | mn0311                                         | mnjt04                                         | mnjt12                                         |
| CCDC Deposition No                                                                  | 755025                                                                                                                                                                                    | 755026                                   | 755027                                         | 755028                                         | 755029                                         |
| Temperature/ K                                                                      | 150                                                                                                                                                                                       | 298                                      | 298                                            | 298                                            | 298                                            |
| Pressure/ GPa                                                                       | 0                                                                                                                                                                                         | 0                                        | 1.5                                            | 2.5                                            | 0                                              |
| Crystal data                                                                        |                                                                                                                                                                                           |                                          |                                                |                                                |                                                |
| Chemical formula                                                                    | [Mn <sub>12</sub> O <sub>16</sub> ( <sup>t</sup> BuCH <sub>2</sub> CO <sub>2</sub> ) <sub>16</sub> (H <sub>2</sub> O) <sub>4</sub> ].xMeNO <sub>2</sub> .yCH <sub>2</sub> Cl <sub>2</sub> |                                          |                                                |                                                |                                                |
| <i>x, y</i>                                                                         | 1, 1                                                                                                                                                                                      | 1,1                                      | 0.75, 0.5                                      | 0, 0                                           | 1,1                                            |
| <i>M<sub>r</sub></i>                                                                | 2898.94                                                                                                                                                                                   | 2911.68                                  | 2853.96                                        | 2765.71                                        | 2911.68                                        |
| <i>a, b, c</i> (Å)                                                                  | 15.8368 (4),<br>16.4179 (5),<br>27.3955 (7)                                                                                                                                               | 16.099 (4),<br>16.702 (4),<br>27.570 (6) | 15.3530 (11),<br>15.5310 (11),<br>26.7020 (12) | 15.0148 (19),<br>15.1418 (19),<br>26.7583 (19) | 16.0888 (10),<br>16.6899 (10),<br>27.5390 (17) |
| $\alpha, \beta, \gamma$ (°)                                                         | 76.817 (2),<br>78.1610 (10),<br>78.264 (2)                                                                                                                                                | 76.585 (4),<br>78.042 (4),<br>77.809 (4) | 76.669 (5),<br>76.441 (5),<br>78.069 (5)       | 76.184 (9),<br>76.208 (8),<br>79.415 (8)       | 76.5270 (10),<br>78.0850 (10),<br>77.7050 (10) |
| <i>V</i> (Å <sup>3</sup> )                                                          | 6695.5 (3)                                                                                                                                                                                | 6950 (3)                                 | 5943.8 (7)                                     | 5685.1 (11)                                    | 6930.0 (7)                                     |
| Radiation type                                                                      | Mo <i>K</i> α                                                                                                                                                                             | Synchrotron X-ray, $\lambda = 0.47800$ Å |                                                |                                                |                                                |
| $\mu$ (mm <sup>-1</sup> )                                                           | 1.17                                                                                                                                                                                      | 0.34                                     | 0.40                                           | 0.41                                           | 0.34                                           |
| Crystal size (mm)                                                                   | 0.66 × 0.41 ×<br>0.35                                                                                                                                                                     | 0.2 × 0.2 ×<br>0.1                       | 0.2 × 0.2 ×<br>0.1                             | 0.2 × 0.2 ×<br>0.1                             | 0.2 × 0.2 ×<br>0.1                             |
| Data collection                                                                     |                                                                                                                                                                                           |                                          |                                                |                                                |                                                |
| Diffractometer                                                                      | Bruker Smart<br>Apex<br>diffractometer                                                                                                                                                    | Bruker APEXII diffractometer             |                                                |                                                |                                                |
| Absorption correction                                                               | Multiscan (SADABS)                                                                                                                                                                        |                                          |                                                |                                                |                                                |
| <i>T<sub>min</sub>, T<sub>max</sub></i>                                             | 0.525, 0.663                                                                                                                                                                              | 0.594, 0.744                             | 0.649, 0.744                                   | 0.646, 0.744                                   | 0.599, 0.744                                   |
| No. of measured,<br>independent and<br>observed [ $I > 2\sigma(I)$ ]<br>reflections | 52152,<br>26597, 20068                                                                                                                                                                    | 68279,<br>27434, 19784                   | 32067, 4879,<br>3177                           | 12135, 3426,<br>2067                           | 68385,<br>27186, 16773                         |
| <i>R<sub>int</sub></i>                                                              | 0.041                                                                                                                                                                                     | 0.043                                    | 0.070                                          | 0.078                                          | 0.050                                          |
| $\theta_{\max}$ (°)                                                                 | 26.4                                                                                                                                                                                      | 17.3                                     | 15.5                                           | 13.5                                           | 17.3                                           |
| Refinement                                                                          |                                                                                                                                                                                           |                                          |                                                |                                                |                                                |
| $R[F^2 > 2\sigma(F^2)],$<br>$wR(F^2), S$                                            | 0.053, 0.145,<br>1.04                                                                                                                                                                     | 0.081, 0.269,<br>1.12                    | 0.108, 0.256,<br>1.04                          | 0.110, 0.286,<br>1.03                          | 0.082, 0.275,<br>1.12                          |
| No. of reflections                                                                  | 26597                                                                                                                                                                                     | 27434                                    | 4879                                           | 3426                                           | 27186                                          |
| No. of parameters                                                                   | 1442                                                                                                                                                                                      | 997                                      | 775                                            | 746                                            | 997                                            |
| No. of restraints                                                                   | 0                                                                                                                                                                                         | 4866                                     | 1849                                           | 1839                                           | 4866                                           |
| $\Delta\rho_{\max}, \Delta\rho_{\min}$ (e Å <sup>-3</sup> )                         | 0.94, -0.60                                                                                                                                                                               | 0.99, -0.80                              | 0.55, -0.40                                    | 0.49, -0.46                                    | 1.06, -0.70                                    |

Table S2. Crystallographic data.

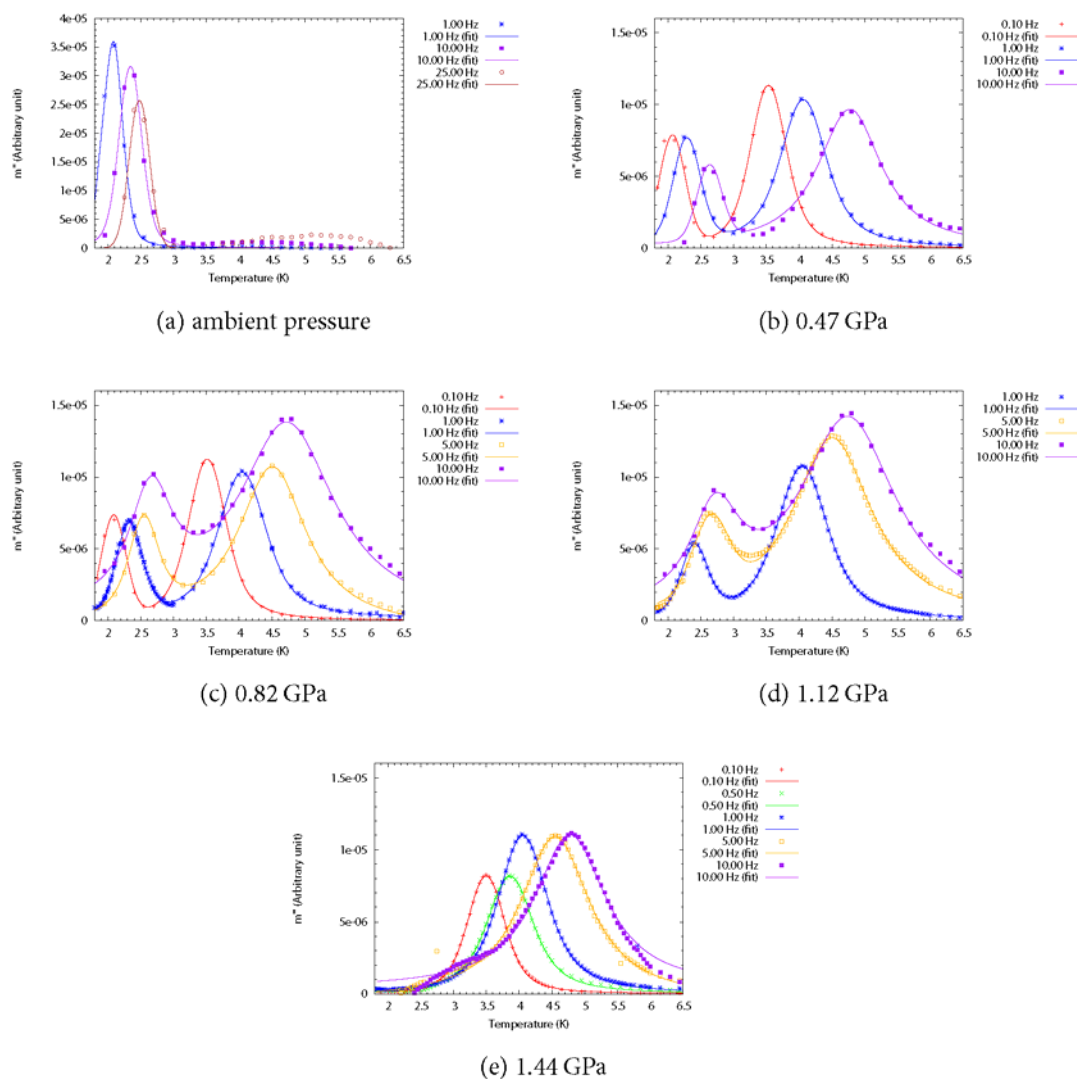

Figure S1. Frequency dependent AC susceptibility data,  $m''$  versus  $T$ , at various pressures from ambient to 1.44 GPa.
